# Supplementary material for: In situ release of IL-2/IL-12 from SiO2-engineered dendritic cells for synergistic immunotherapy
Source: Royal Society of Chemistry journal article supplement (doi:10.1039/d2nr02012b), 2022-01-01
Supplement: d2nr02012b1.pdf [file d2nr02012b1.pdf]

## Supplementary Information

# In situ IL-2/IL-12 released from SiO<sub>2</sub>-engineered dendritic cells for synergistic immunotherapy

Rong Xu,<sup>a</sup> Kaijing Liu,<sup>a</sup> Xiaoli Wang,<sup>\*a</sup> Chuangnian Zhang,<sup>a</sup> Yajing Zhang<sup>b</sup> and Jing Yang<sup>\*a</sup>

*a. Tianjin Key Laboratory of Biomaterial Research, Institute of Biomedical Engineering, Chinese Academy of Medical Sciences & Peking Union Medical College, Tianjin 300192, China.*

*b. NHC Key Laboratory of Hormones and Development, Tianjin Key Laboratory of Metabolic Diseases, Chu Hsien-I Memorial Hospital & Tianjin Institute of Endocrinology, Tianjin Medical University, Tianjin 300134, China.*

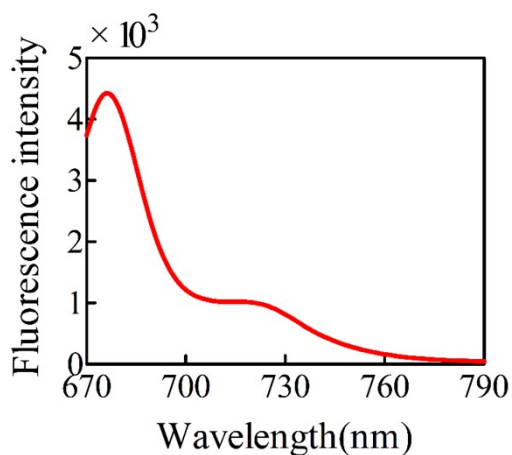

**Fig. S1** Fluorescence spectrum of Pheoa-MAL, the excitation wavelengths was 665 nm, emission wavelength was 676 nm.

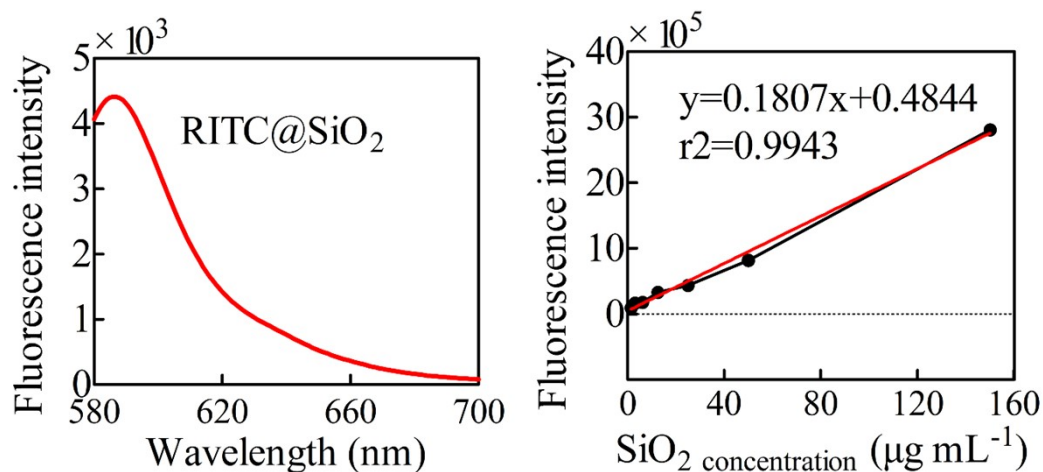

**Fig. S2** The fluorescence spectrum of RITC@SiO<sub>2</sub>-MAL (excitation wavelength of 556 nm, emission wavelength of 590 nm) and the standard curve of fluorescence intensity as a function of RITC@SiO<sub>2</sub>-MAL mass concentration.

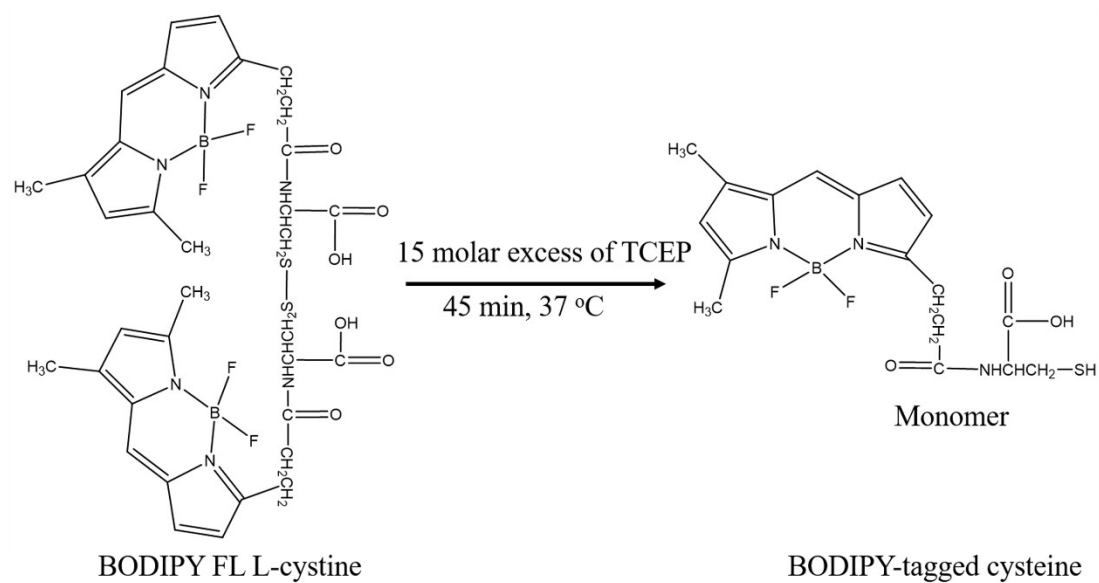

**Fig. S3** BODIPY L-cystine is virtually nonfluorescent due to interactions between the two fluorophores. However, thiol-specific exchange with thiolated biomolecules occurs to form mixed disulfides, resulting in green fluorescence. Disulfide crosslinks of cystines can be reduced to cysteine residues by TCEP (Tris-(2-Carboxyethyl)phosphine, Hydrochloride). Unlike dithiothreitol, TCEP does not contain thiols and therefore usually does not need to be removed prior to thiol modification.

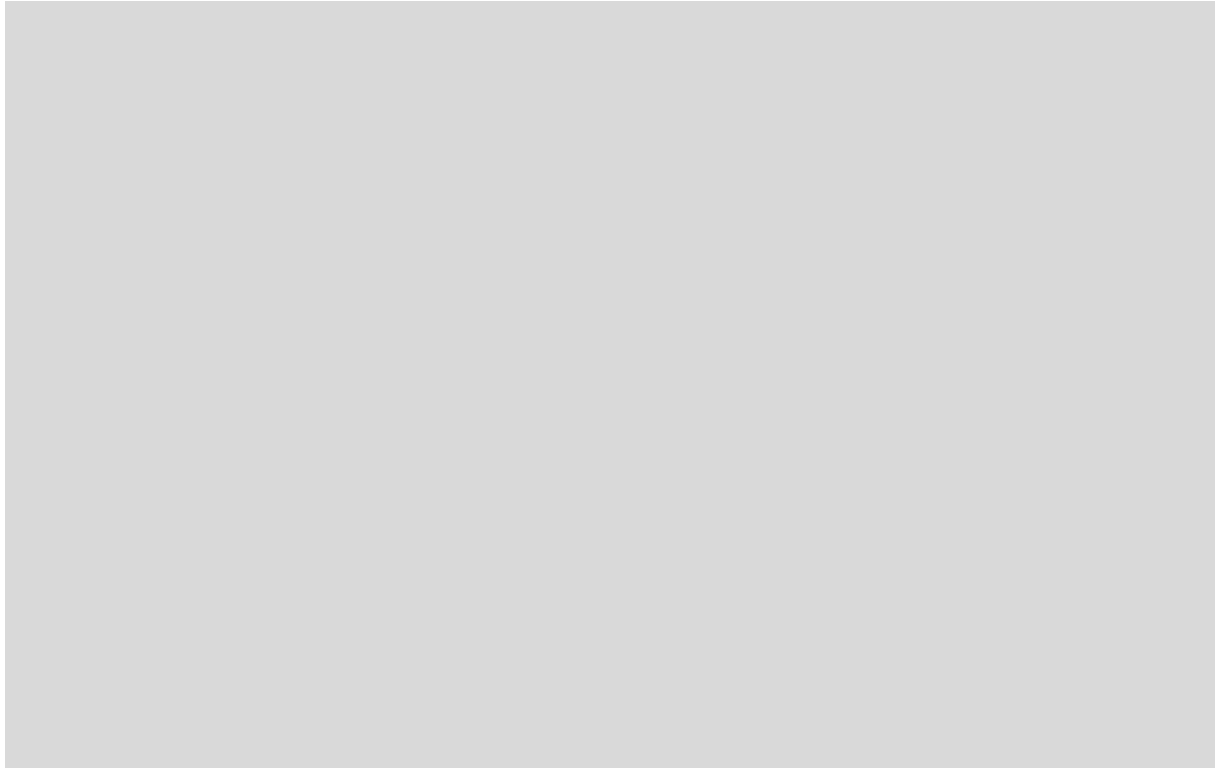

**Fig. S4** Flow cytometry analysis of mBMDCs conjugated with 6.25  $\mu\text{g}/\text{mL}$  of  $\text{SiO}_2$ -MAL and PEGylated with indicated PEG-SH concentrations. Unreacted -MAL groups on  $\text{SiO}_2$ -MAL were detected by staining particle-conjugated cells with BODIPY-tagged cysteine.

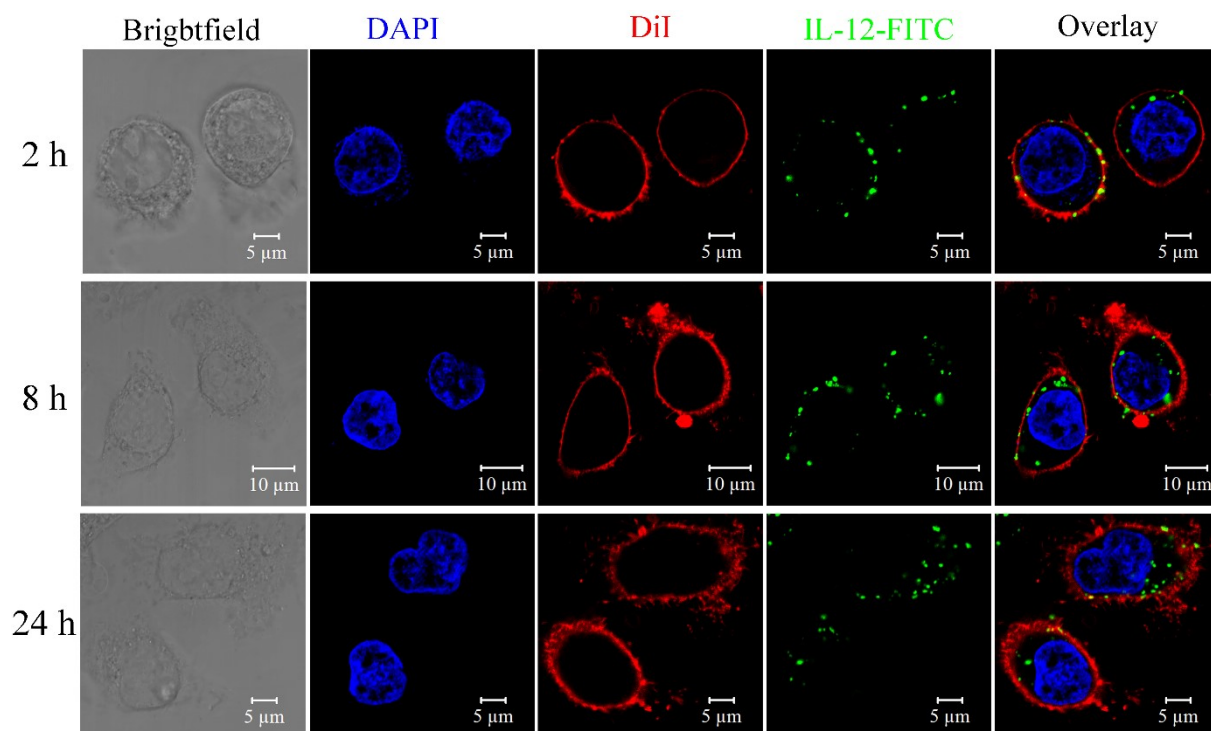

**Fig. S5**  $\text{SiO}_2$  NPs can be internalized by naïve BMDCs, CLSM images of IL-12-FITC@ $\text{SiO}_2$ -conjugated naïve BMDCs after *in vitro* culture of 2 h, 8 h and 24 h, the cells nuclei was stained with DAPI, and the cells membrane was stained with DiI.

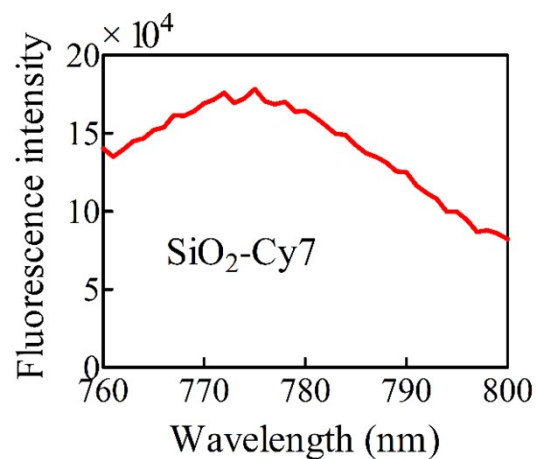

**Fig. S6** Fluorescence spectrum of Cy7@ $\text{SiO}_2$ -MAL suspension, the excitation wavelengths was 743 nm, emission wavelength was 775 nm.

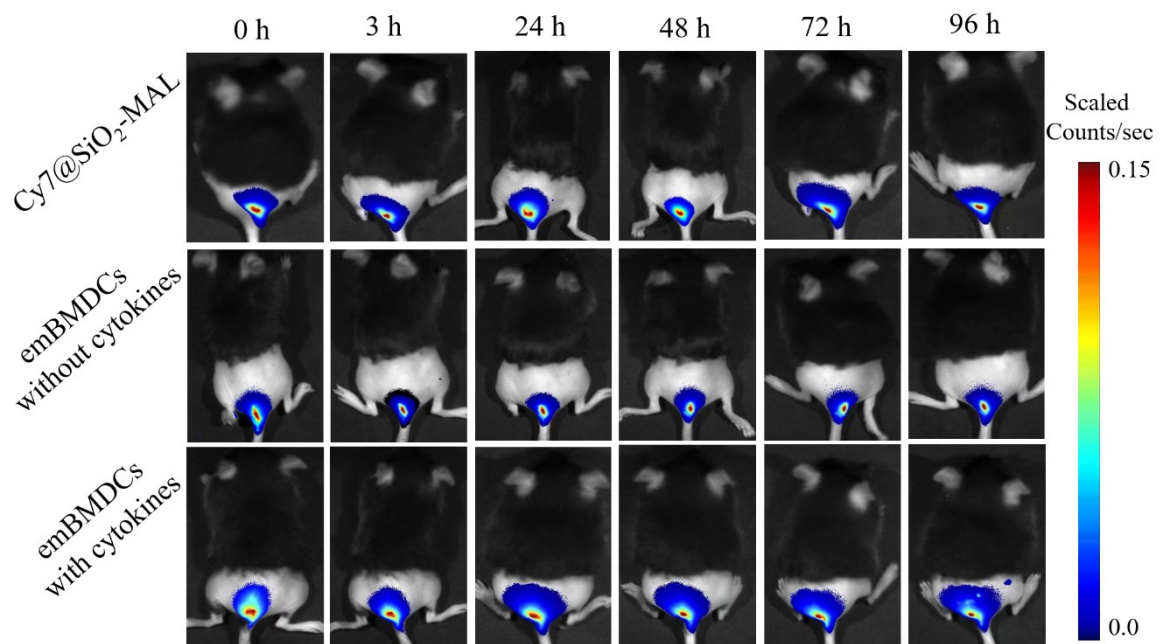

**Fig. S7** The Cy7 fluorescent signal at the administration site of mice vaccinated by Cy7@SiO<sub>2</sub>-MAL or emBMDCs engineered with Cy7@SiO<sub>2</sub>-MAL or IL-2/IL-4-loaded Cy7@SiO<sub>2</sub>-MAL.

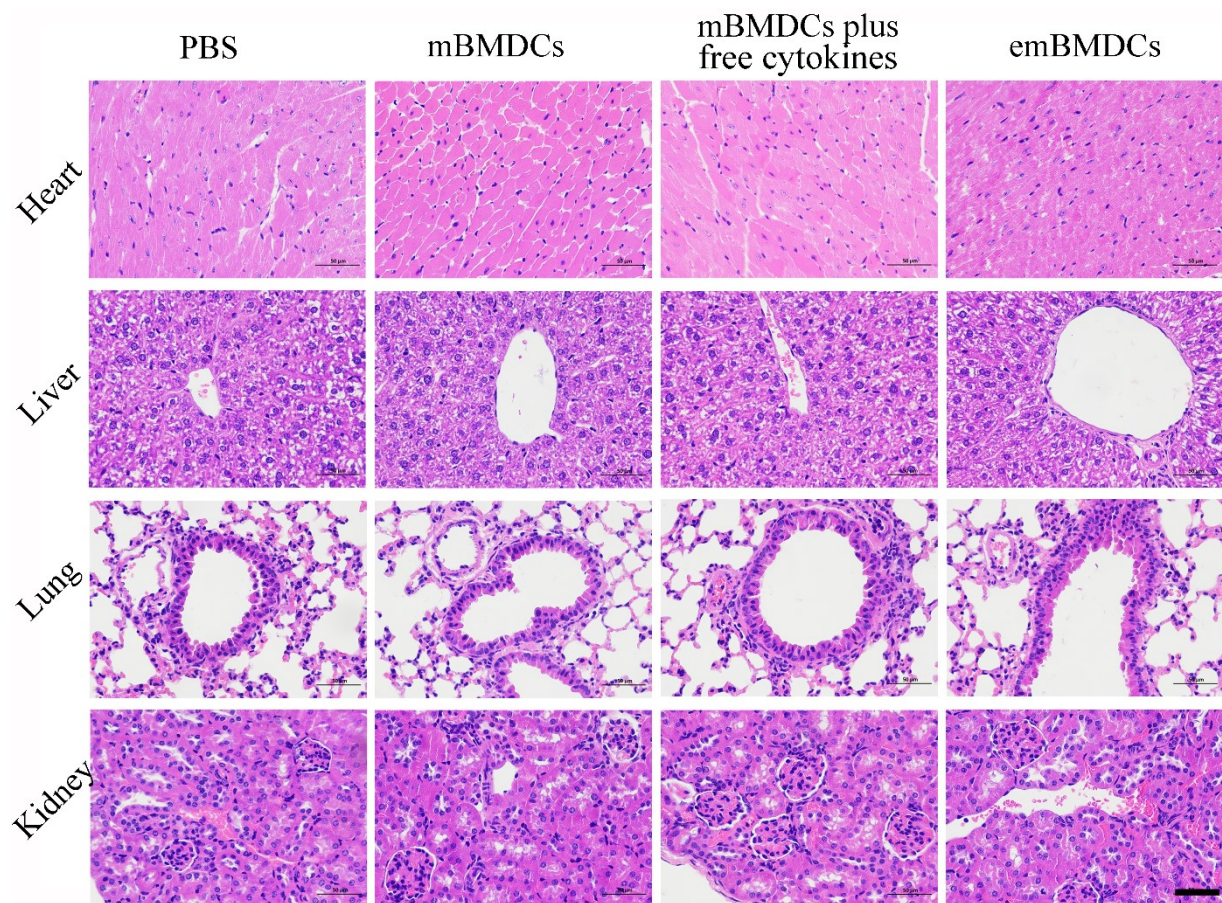

**Fig. S8** Hematoxylin and eosin (HE) staining of mice organ sections after different treatments, the magnification of all the images was 40 $\times$ .



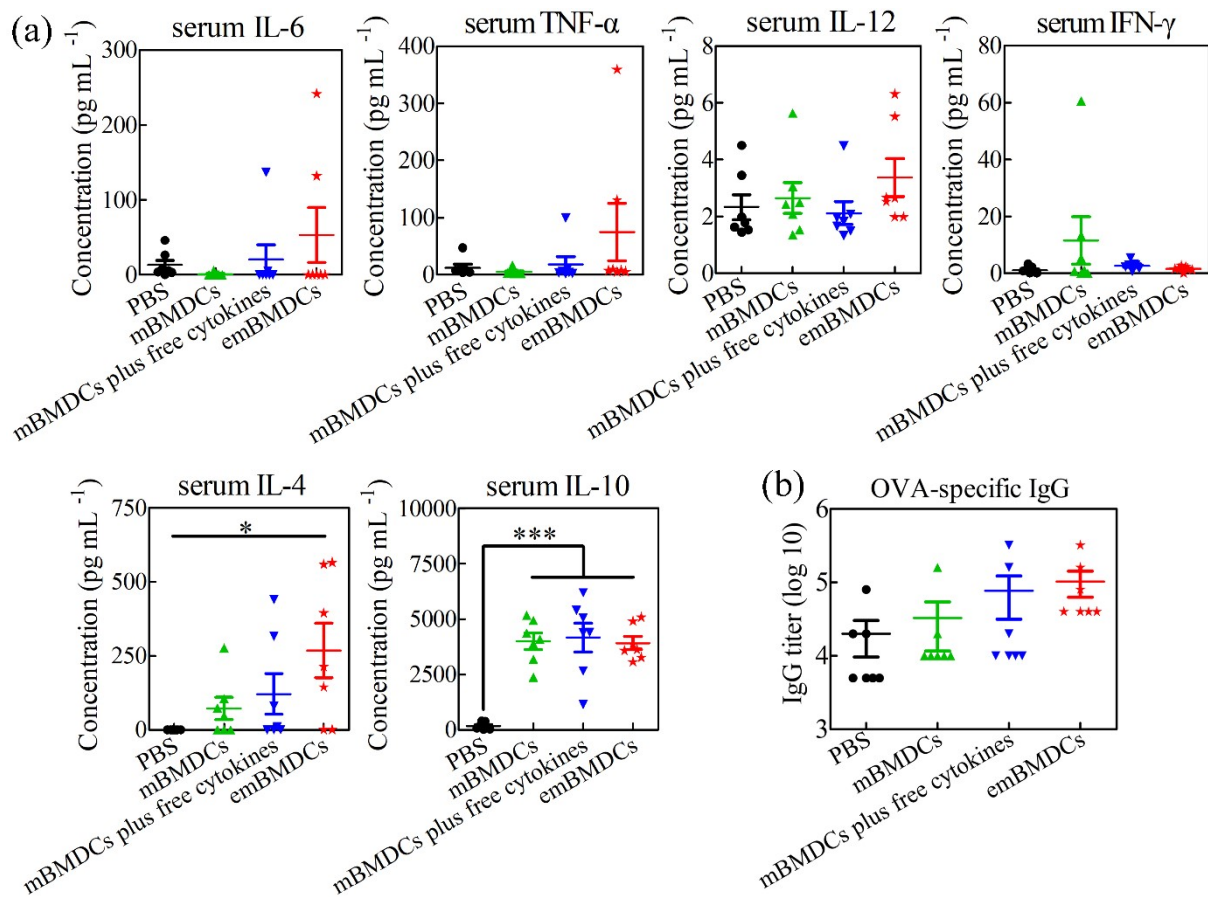

**Fig. S9** (a) The serum proinflammatory cytokines (IL-6, TNF- $\alpha$ , IL-12 and IFN- $\gamma$ ) and (b) the OVA specific total IgG titer of mice stimulated with PBS, mBMDCs, mBMDCs plus free cytokines and emBMDCs.
